# Supplementary material for: Complex shape deformations of homogeneous poly(N-isopropylacrylamide)/graphene oxide hydrogels programmed by local NIR irradiation
Source: Royal Society of Chemistry journal article supplement (doi:10.1039/c7tb02119d), 2017-01-01
Supplement: c7tb02119d1.pdf [file c7tb02119d1.pdf]

## Electronic Supplementary Information

### Complex shape deformations of homogeneous poly(*N*-isopropylacrylamide)/graphene oxide hydrogels actuated by local NIR irradiation

Xin Peng, Tianqi Liu, Chen Jiao, Yuqing Wu, Nan Chen, and Huiliang Wang\*

Beijing Key Laboratory of Energy Conversion and Storage Materials, College of Chemistry, Beijing Normal University, Beijing 100875, P. R. China.

E-mail: wanghl@bnu.edu.cn

## Supporting Figures

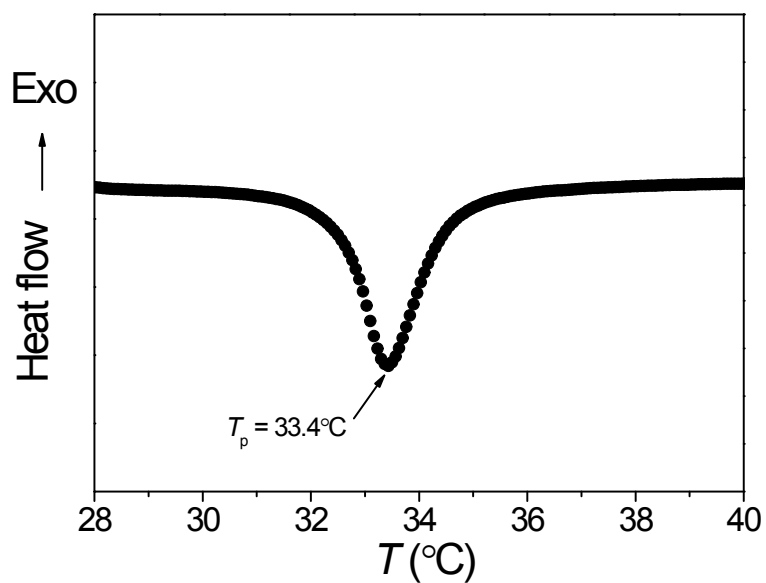

Fig. S1 DSC thermogram of a PNIPAM/GO hydrogel.

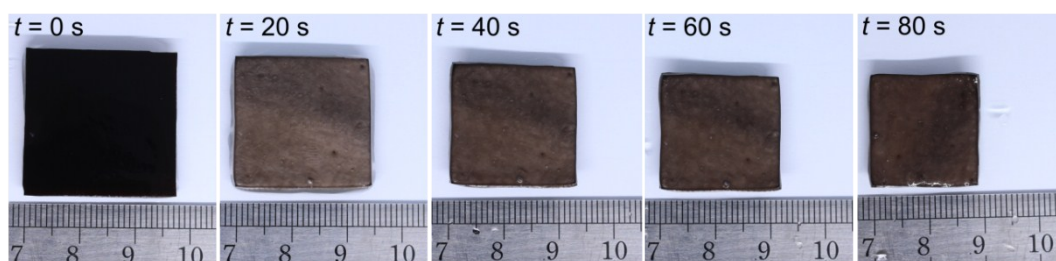

Fig. S2 Isotropic shrinkage of a homogeneous hydrogel in 45  $^{\circ}\text{C}$  water.

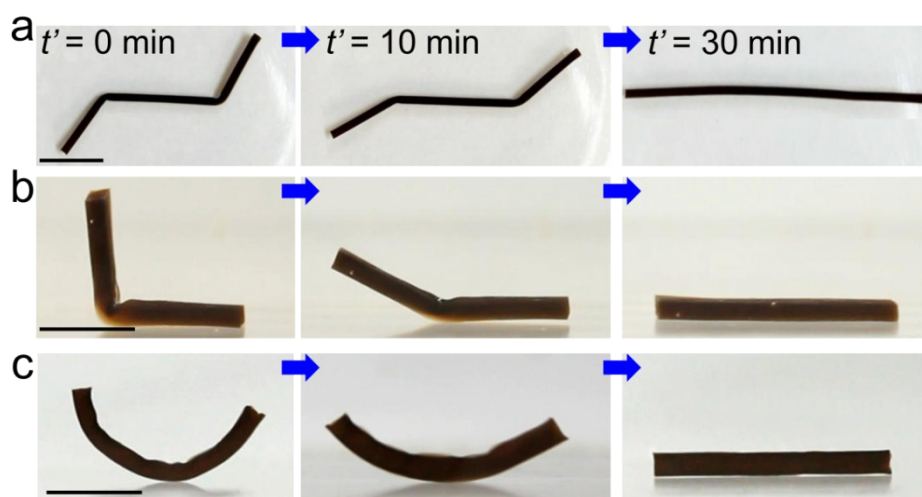

Fig. S3 Shape recovery of deformed hydrogel samples in water after turning off NIR laser. Scale

bar is 1 cm.

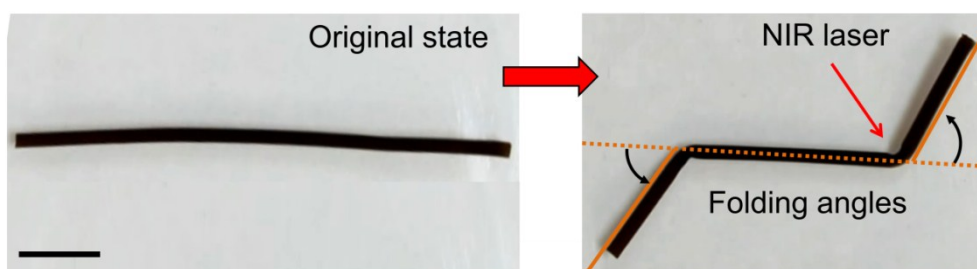

**Fig. S4** Definition of the folding angle. The black arrows indicate the folding angles. Scale bar is 1 cm.

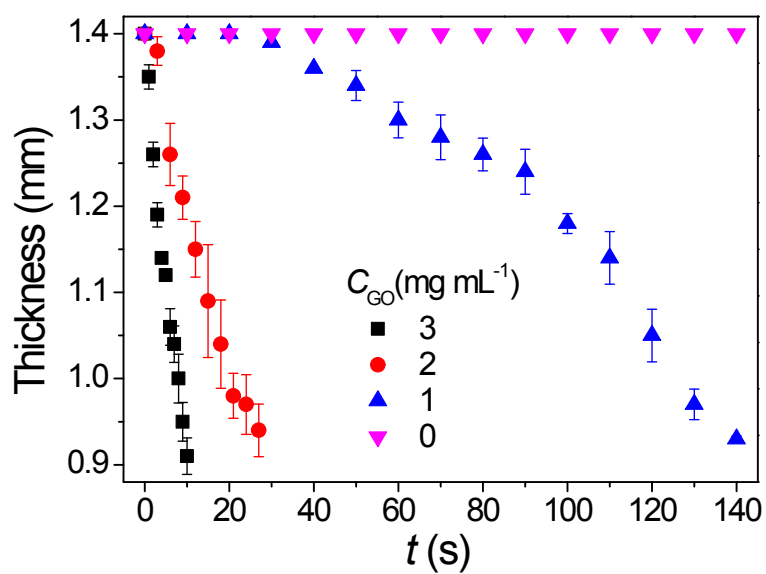

**Fig. S5** Change of the thickness of the hydrogels with different  $C_{GO}$  under NIR irradiation. All experiments were conducted in triplicate and the errors bars represent standard deviations.

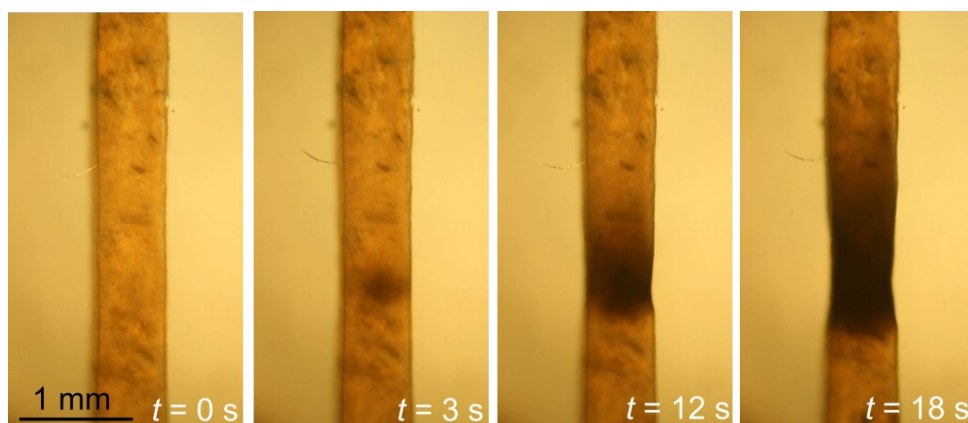

**Fig. S6** Shrinkage of a hydrogel strip with a thickness of 0.6 mm under NIR irradiation observed with a microscope.

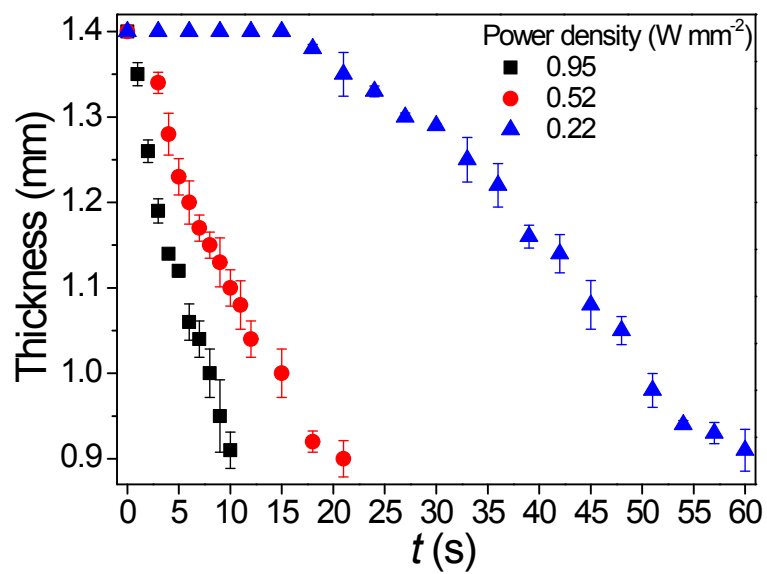

**Fig. S7** Change of the thickness of the hydrogels under NIR irradiation with different power densities. All experiments were conducted in triplicate and the errors bars represent standard deviations.

## Supporting Movies

**Movie S1.** The deformation of a PNIPAM/GO hydrogel a thickness of 1.4 mm observed with a microscope.

**Movie S2.** The folding and bending deformations of hydrogel samples.

**Movie S3.** The deformation of a hydrogel with a thickness of 0.6 mm observed with a microscope.

**Movie S4.** The body movements of a human-shaped hydrogel.

**Movie S5.** The closing of the leaves of a mimosa-shaped hydrogel.
